# Supplementary material
Source: PubMed Central journal article supplement (PMC3754535)
Supplement: EC.00123-13_zek999094143so1.pdf [file EC.00123-13_zek999094143so1.pdf]

1 **Supplementary Figure 1**

2

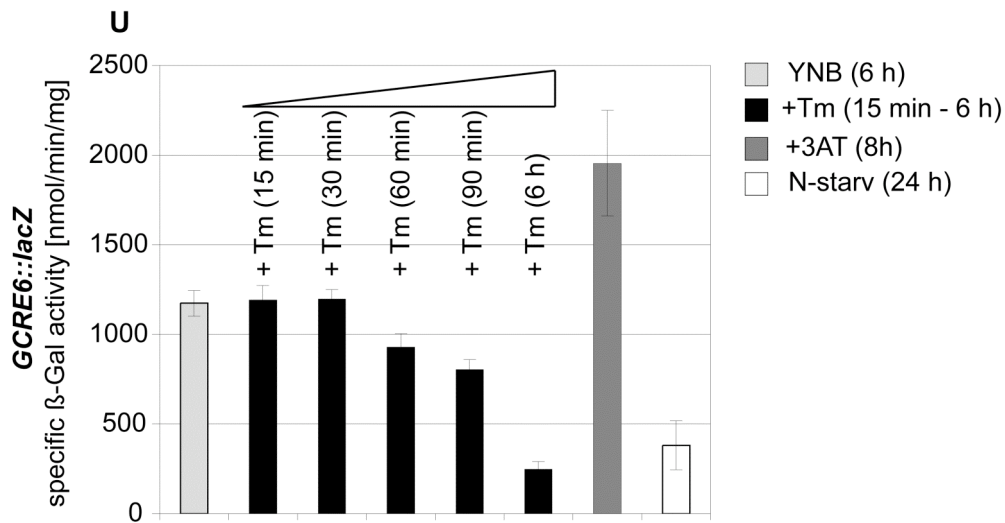

3

4

5

6

6 **Supplementary Figure 1. Kinetics of *GCRE6::lacZ* repression after tunicamycin-mediated ER stress.**

7

8 Expression of the *GCRE6::lacZ* reporter gene was determined in the haploid  $\Sigma$ 1278b  
 9 wild type strain RH3409 under non-starvation (YNB, light gray bar) in comparison to  
 10 different starvation or stress conditions. Amino acid (3AT, dark gray bar) and nitrogen  
 11 starvation (N-starv, white bar) were induced as described in Figure 2B. For ER stress  
 12 conditions cells were incubated either in the presence of 1  $\mu$ g/ml Tm for 6 h (Tm,  
 13 black bar) or cells were initially grown for 6 h under non-stress conditions before  
 14 incubating for indicated time points with 1  $\mu$ g/ml Tm (black bars; Tm induction for 15,  
 15 30, 60 and 90 min). Specific  $\beta$ -galactosidase were analyzed as described in Figure  
 16 2B.

17

18

18 **Supplementary Figure 2**

19

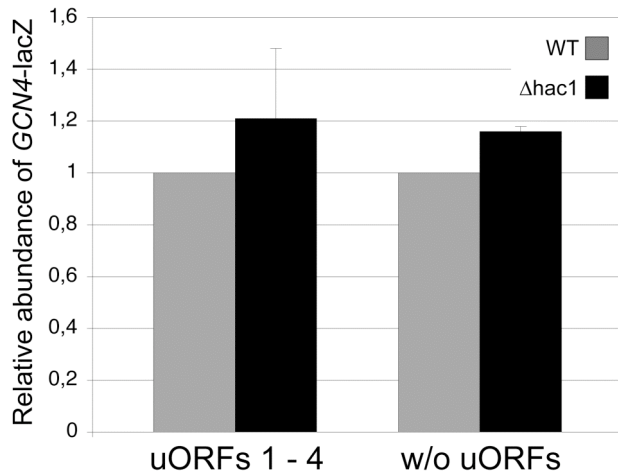

20

21

22

23

24

**Supplementary Figure 2. GCN4-lacZ expression is independent of Hac1.**

25

Relative *GCN4-lacZ* levels of haploid wild type strain (RH2816) as well haploid *HAC1* deletion strain (RH3351) expressing the *GCN4-lacZ* fusion gene either with (p180) or without (p227) all four uORFs were determined after growth for 6h in YNB. Bars depict means of at least three independent measurements of  $\beta$ -galactosidase activities.

29

30

30 **Supplementary Table 1**

31

$\beta$ -Galactosidase assays of individual 400 bp *FLO11* promoter elements cloned into the UAS of a *CYC1::lacZ* reporter construct.

|              | Wild type ( <i>Mata/α</i> )<br>Units (nmol/min/mg) |      | $\Delta$ <i>hac1/Δhac1</i><br>Units (nmol/min/mg) |      | $\Delta$ <i>gcn4/Δgcn4</i><br>Units (nmol/min/mg) |      |
|--------------|----------------------------------------------------|------|---------------------------------------------------|------|---------------------------------------------------|------|
|              | YNB                                                | +3AT | YNB                                               | +3AT | YNB                                               | +3AT |
| <i>FLO11</i> | 27                                                 | 227  | 27                                                | 75   | 12                                                | 28   |
| No insert    | 19                                                 | 39   | 22                                                | 50   | 8                                                 | 17   |
| 2/1          | 36                                                 | 61   | 40                                                | 82   | 15                                                | 30   |
| 3/2          | 107                                                | 121  | 123                                               | 138  | 33                                                | 69   |
| 4/3          | 61                                                 | 78   | 46                                                | 106  | 12                                                | 25   |
| 5/4          | 36                                                 | 60   | 35                                                | 64   | 8                                                 | 23   |
| 6/5          | 674                                                | 1530 | 336                                               | 768  | 120                                               | 176  |
| 7/6          | 806                                                | 920  | 323                                               | 254  | 108                                               | 158  |
| 8/7          | 58                                                 | 69   | 34                                                | 50   | 9                                                 | 15   |
| 9/8          | 70                                                 | 92   | 60                                                | 121  | 21                                                | 44   |
| 10/9         | 100                                                | 333  | 69                                                | 211  | 27                                                | 72   |
| 11/10        | 287                                                | 255  | 822                                               | 537  | 172                                               | 463  |
| 12/11        | 92                                                 | 99   | 95                                                | 94   | 23                                                | 55   |
| 13/12        | 33                                                 | 64   | 31                                                | 59   | 11                                                | 28   |
| 14/13        | 33                                                 | 64   | 29                                                | 81   | 12                                                | 30   |
| 15/14        | 28                                                 | 68   | 35                                                | 101  | 11                                                | 34   |

32

33 The diploid wild type strain (RH2656) as well as diploid  $\Delta$ *hac1/Δhac1* (RH3412) and  
 34  $\Delta$ *gcn4/Δgcn4* (RH2658) mutant strains were transformed with indicated *CYC1::lacZ*  
 35 reporter constructs (53) and expression was assayed under non-starvation conditions  
 36 (YNB) compared to amino acid starvation induced by adding 10 mM 3AT (3AT). The  
 37 received  $\beta$ -galactosidase units (nmol/min/mg) are given for each sequence element  
 38 in each strain and represent mean values of at least three independent  
 39 measurements.

40
